# Supplementary material for: Mixed Chinese Fir Plantations Alter the C, N, and P Resource Limitations Influencing Microbial Metabolism in Soil Aggregates
Source: MDPI journal article supplement (doi:10.3390/f15040724), 2024-04-21
Supplement: s1 [file s1]

**Supplementary Table S1.** Effects of stand and aggregates and their interactions on soil organic C, N and P and their stoichiometric ratios.

| Soil layer | Indicator  | Stand type (S), d.f. =2 |          | Aggregate size (A), d.f. =3 |          | S × A, d.f. =6 |          | Adjusted R <sup>2</sup> |
|------------|------------|-------------------------|----------|-----------------------------|----------|----------------|----------|-------------------------|
|            |            | <i>F</i>                | <i>P</i> | <i>F</i>                    | <i>P</i> | <i>F</i>       | <i>P</i> |                         |
| 0-10 cm    | OC         | 1603.27                 | < 0.001  | 276.61                      | < 0.001  | 8.85           | < 0.001  | 0.986                   |
|            | TN         | 253.52                  | < 0.001  | 1.48                        | 0.232    | 8.33           | < 0.001  | 0.903                   |
|            | TP         | 12.23                   | < 0.001  | 1.67                        | 0.187    | 0.66           | 0.680    | 0.276                   |
|            | ROC        | 497.83                  | < 0.001  | 1.64                        | 0.192    | 0.34           | 0.913    | 0.944                   |
|            | AN         | 504.92                  | < 0.001  | 10.05                       | < 0.001  | 2.80           | 0.020    | 0.947                   |
|            | AP         | 109.60                  | < 0.001  | 49.75                       | < 0.001  | 7.92           | < 0.001  | 0.873                   |
|            | C: N ratio | 0.89                    | 0.417    | 32.58                       | < 0.001  | 7.41           | < 0.001  | 0.693                   |
|            | C: P ratio | 7.23                    | 0.002    | 2.12                        | 0.110    | 0.69           | 0.660    | 0.191                   |
|            | N: P ratio | 6.10                    | 0.004    | 1.30                        | 0.287    | 0.42           | 0.862    | 0.114                   |
| 10-20 cm   | OC         | 683.18                  | < 0.001  | 130.38                      | < 0.001  | 8.81           | < 0.001  | 0.968                   |
|            | TN         | 13.36                   | < 0.001  | 10.32                       | < 0.001  | 10.38          | < 0.001  | 0.649                   |
|            | TP         | 9.41                    | < 0.001  | 5.89                        | 0.002    | 1.77           | 0.126    | 0.380                   |
|            | ROC        | 65.88                   | < 0.001  | 4.83                        | 0.005    | 1.73           | 0.135    | 0.712                   |
|            | AN         | 223.67                  | < 0.001  | 11.89                       | < 0.001  | 5.34           | < 0.001  | 0.895                   |
|            | AP         | 118.73                  | < 0.001  | 5.52                        | 0.002    | 18.20          | < 0.001  | 0.857                   |
|            | C: N ratio | 46.98                   | < 0.001  | 2.16                        | 0.106    | 7.48           | < 0.001  | 0.695                   |
|            | C: P ratio | 23.56                   | < 0.001  | 1.34                        | 0.272    | 1.21           | 0.317    | 0.446                   |
|            | N: P ratio | 9.92                    | < 0.001  | 1.16                        | 0.336    | 2.50           | 0.035    | 0.317                   |

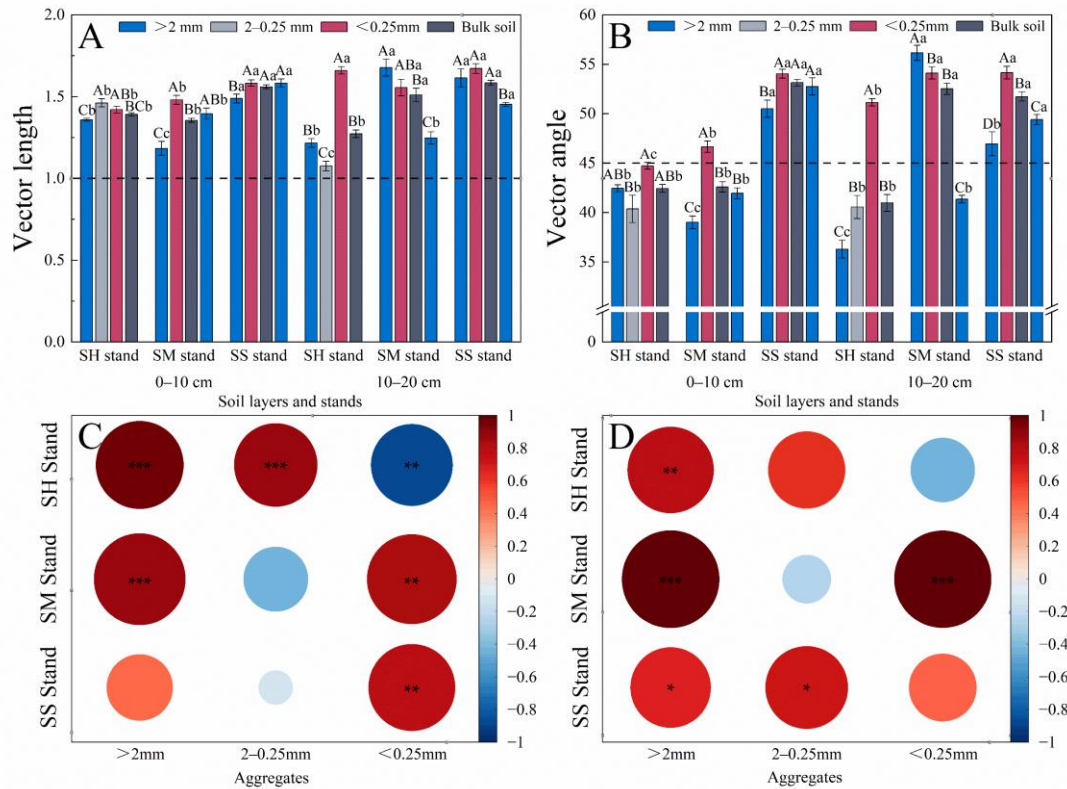

**Supplementary Figure S1.** Effect of different stands on vector length (A), vector angle (B) and their correlation. Pearson's correlation analysis for aggregates and total soil with respect to vector length (C) and vector angle (D). Different lowercase letters indicate significant differences among different stand types for the same aggregate size and soil layer ( $p < 0.05$ ). Different capital letters indicate significant differences among different aggregates in the same stand type and soil layer ( $p < 0.05$ ). Solid and dashed lines represent the significant and nonsignificant linear relationship between VA and VL ( $p < 0.05$ ), respectively. The symbols \*, \*\* and \*\*\* indicate significance at the 0.05, 0.01 and 0.001 levels, respectively.
